# Supplementary material
Source: Springer Nature journal article supplement (https://www.springermedizin.de/resource/supplementary/12874_2012_998_MOESM10_ESM.pdf/9433016)

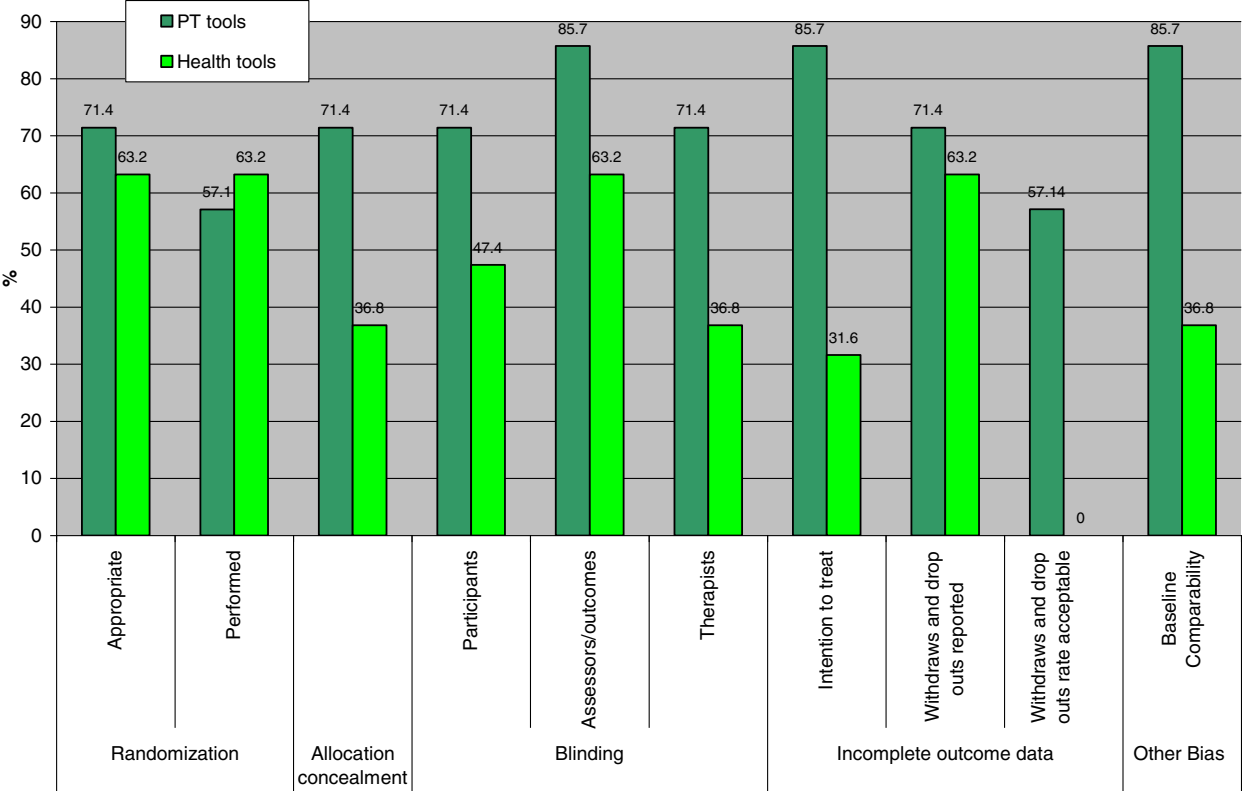

Supplement: MOESM10 [file 9433016]
